# Supplementary material for: Air pollution and cardiovascular disease hospitalization – Are associations modified by greenness, temperature and humidity?
Source: PubMed Central journal article supplement — Environ Int. Author manuscript; Available in PMC 2021 Nov 1. (PMC8380672; doi:10.1016/j.envint.2021.106715), 2021-07-02
Supplement: NIHMS1720989-supplement-1.pdf [file NIHMS1720989-supplement-1.pdf]

## Supplementary Appendix for

**Air pollution and cardiovascular disease hospitalization – are associations modified by greenness, temperature and humidity?**

### Authors:

**Jochem O Klompmaker<sup>a</sup>, Jaime E Hart<sup>a,b</sup>, Peter James<sup>a,c</sup>, M Benjamin Sabath<sup>d</sup>, Xiao Wu<sup>b,d,e</sup>, Antonella Zanobetti<sup>d</sup>, Francesca Dominici<sup>d\*</sup>, Francine Laden<sup>a,b,e\*</sup>**

<sup>a</sup> *Department of Environmental Health, Harvard T. H. Chan School of Public Health, 655 Huntington Avenue, Boston, Massachusetts 02115*

<sup>b</sup> *Channing Division of Network Medicine, Department of Medicine, Brigham and Women's Hospital, 181 Longwood Avenue, Boston, Massachusetts 02115*

<sup>c</sup> *Department of Population Medicine, Harvard Medical School and Harvard Pilgrim Health Care Institute, 401 Park Drive, Boston, Massachusetts 02215*

<sup>d</sup> *Department of Biostatistics, Harvard T.H. Chan School of Public Health, 677 Huntington Avenue, Boston, Massachusetts 02115*

<sup>e</sup> *Department of Epidemiology, Harvard T. H. Chan School of Public Health, 677 Huntington Avenue, Boston, Massachusetts 02115*

*\* contributed equally as last authors*

### Corresponding author:

Jochem O Klompmaker, PhD

Postdoctoral fellow

Department of Environmental Health

Harvard T. H. Chan School of Public Health

Landmark Center, 401 Park Drive, Boston MA 02215

[jklopmaker@hsph.harvard.edu](mailto:jklopmaker@hsph.harvard.edu)

**Table of contents:**

Figure S1. Geographical regions of the US

Figure S2. The spatial variation of mean summer and winter temperature and specific humidity, summer NDVI, and Ox

Figure S3. Pearson correlations.

Figure S4. Results of models with increasing adjustment for potential confounders.

Figure S5. Exposure-response curves.

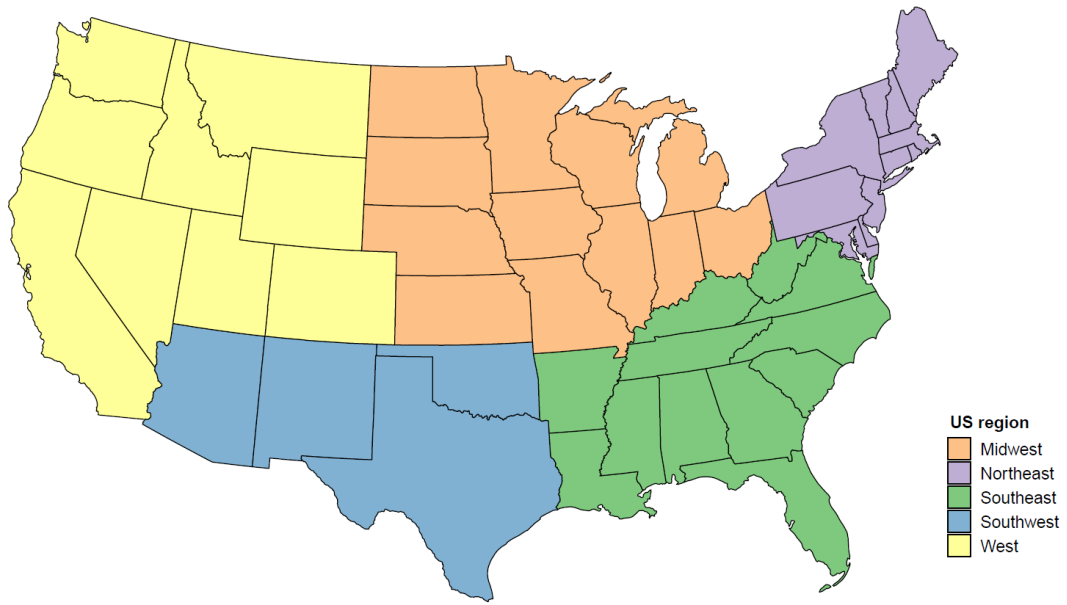

**Figure S1. Geographical regions of the US based on geographical position, climate and cultural differences.**

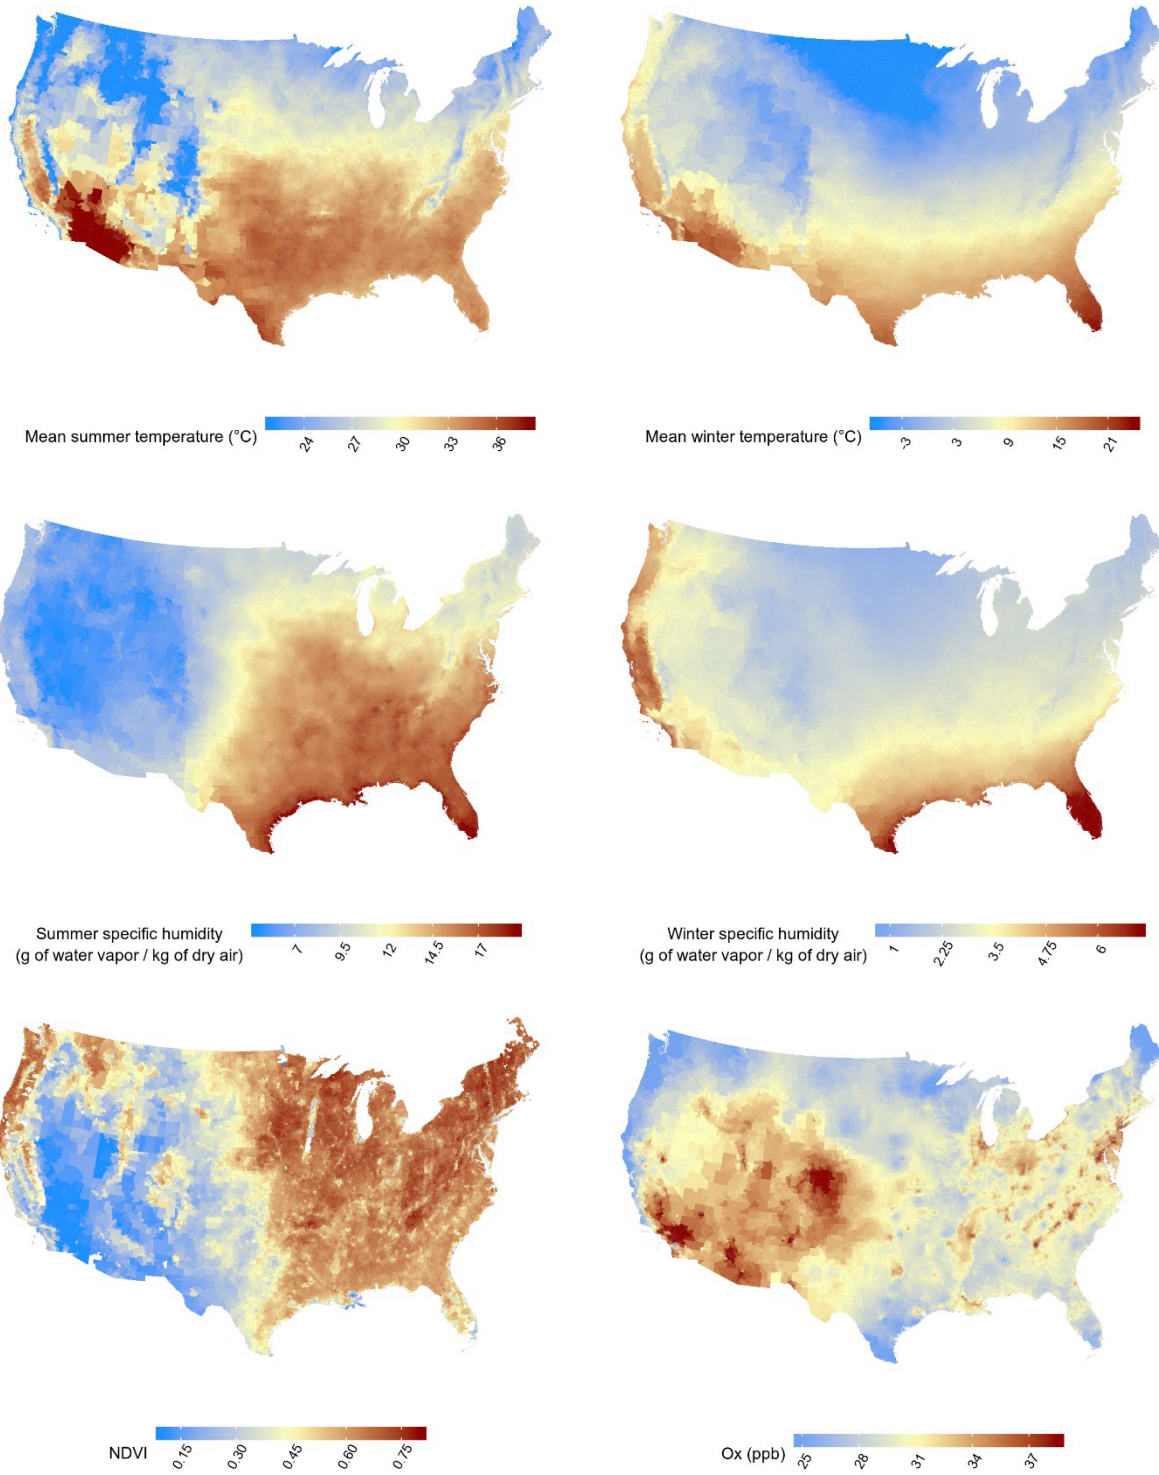

**Figure S2.** The spatial variation of the mean daily maximum summer and winter temperature, mean daily ambient summer and winter specific humidity, summer NDVI and Ox per zip code in the contiguous US (year = 2010).



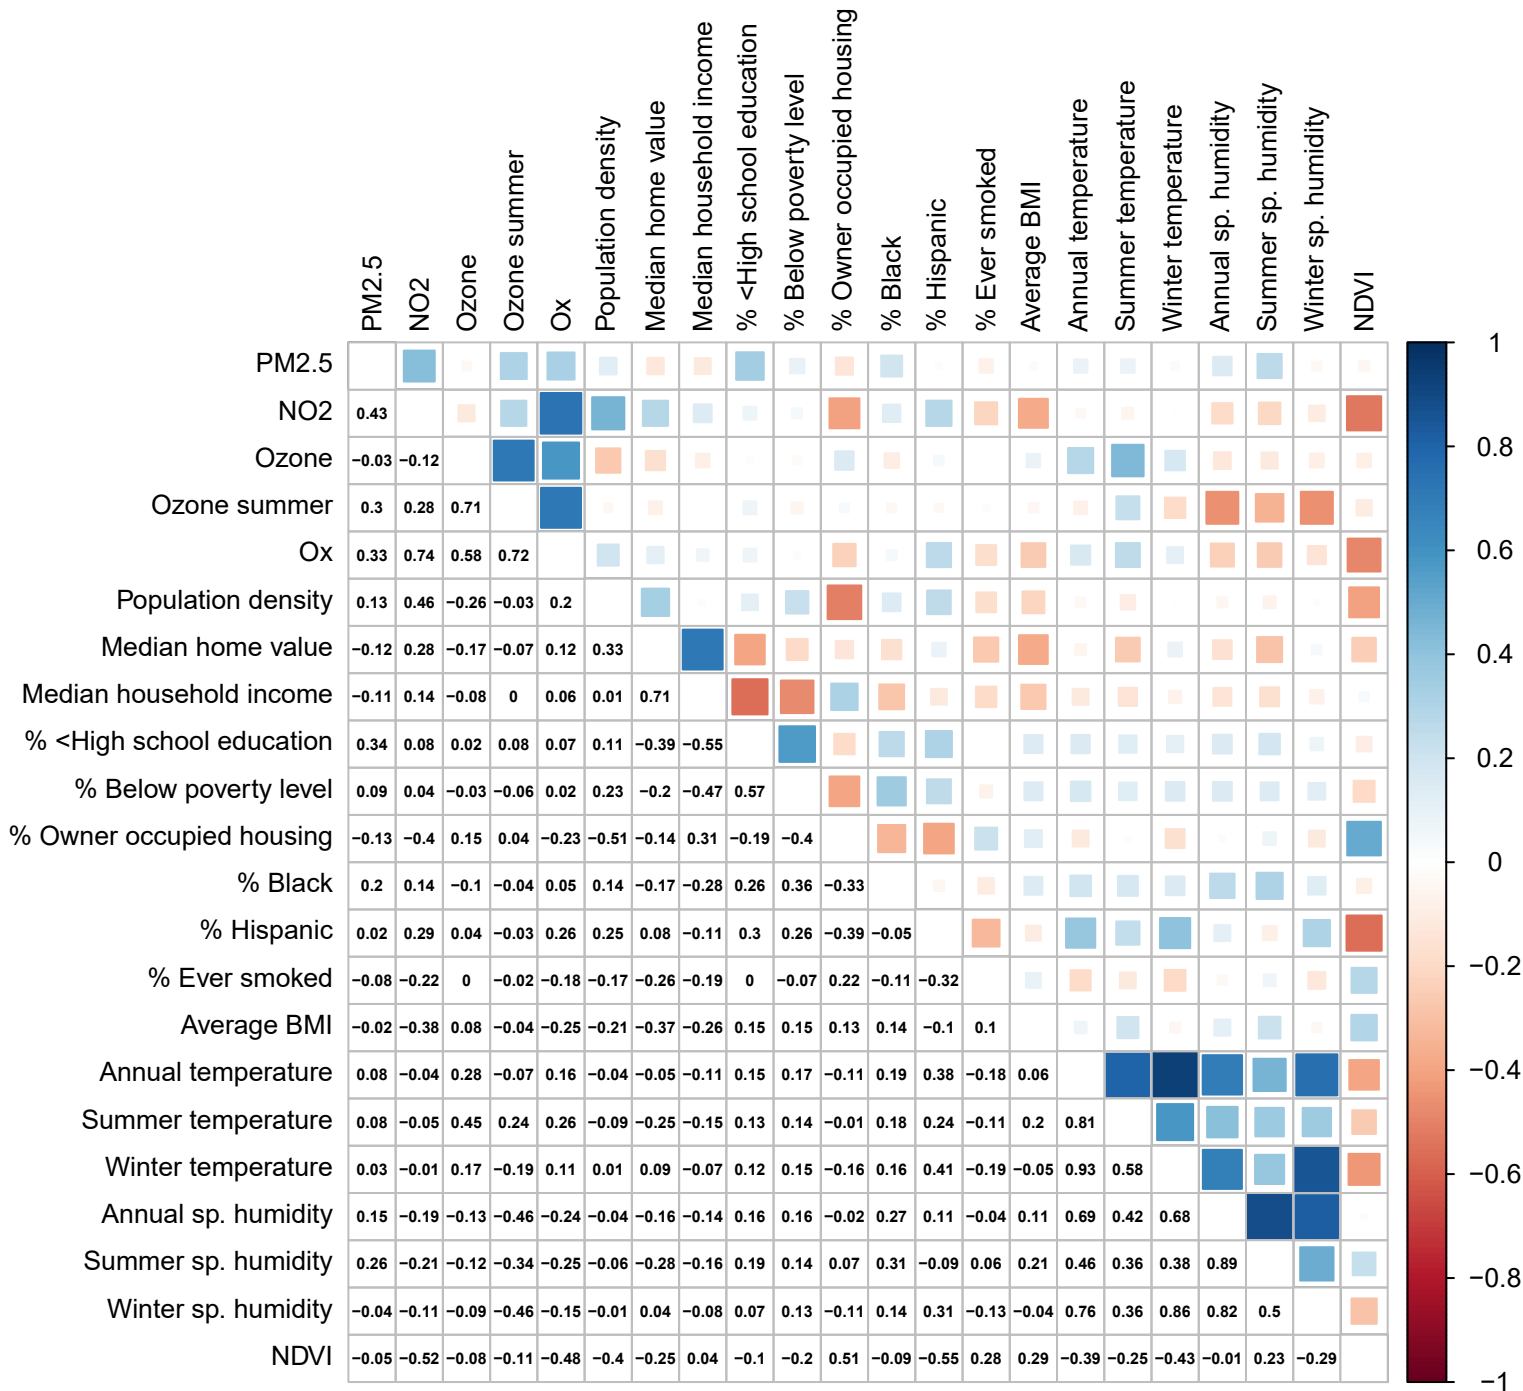

**Figure S3. Pearson correlation between PM<sub>2.5</sub>, NO<sub>2</sub>, Ozone, and covariates <sup>a</sup>.**

<sup>a</sup> The correlations shown are correlations in the cardiovascular disease hospitalization cohort. Correlations in the coronary heart disease hospitalization and in the cerebrovascular disease hospitalization cohort are very similar to the correlations shown in this figure.

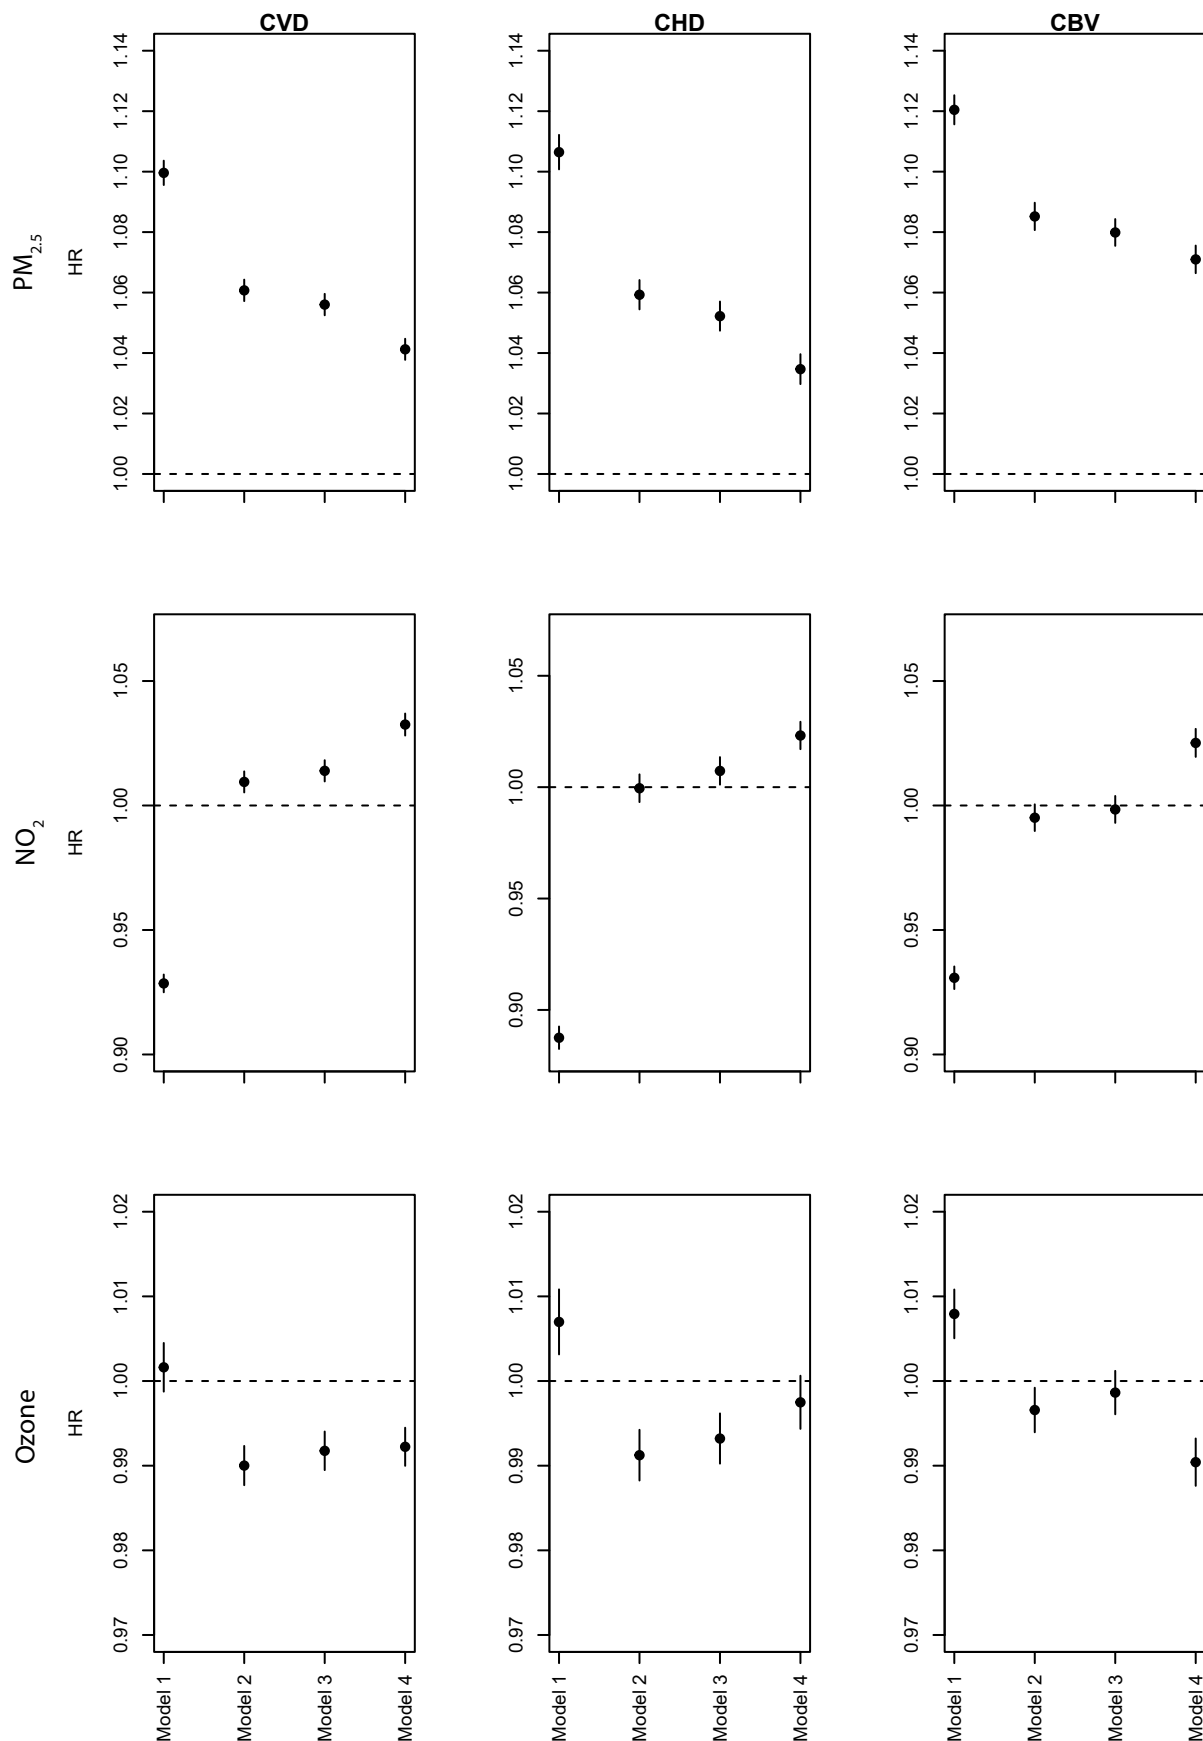

**Figure S4. Associations of PM<sub>2.5</sub>, NO<sub>2</sub> and Ozone with cardiovascular disease hospitalization (CVD), coronary heart disease hospitalization (CHD) and cerebrovascular disease hospitalization (CBV), in model with increasing adjustment for potential confounders <sup>a, b</sup>.**

<sup>a</sup> Associations are expressed per IQR increase (IQR PM<sub>2.5</sub> = 4.0 µg/m<sup>3</sup>, IQR NO<sub>2</sub> = 13.9 ppb, IQR Ozone = 4.4 ppb) of the cardiovascular disease hospitalization cohort.

<sup>b</sup> Model 1 included PM<sub>2.5</sub>, NO<sub>2</sub> and ozone and strata for all possible combinations of sex, race, dual, age at study entry (2-year categories) and follow-up year. In Model 2 all US census covariates were added. In Model 3 BRFSS covariates were added. In Model 4 US regions were added.

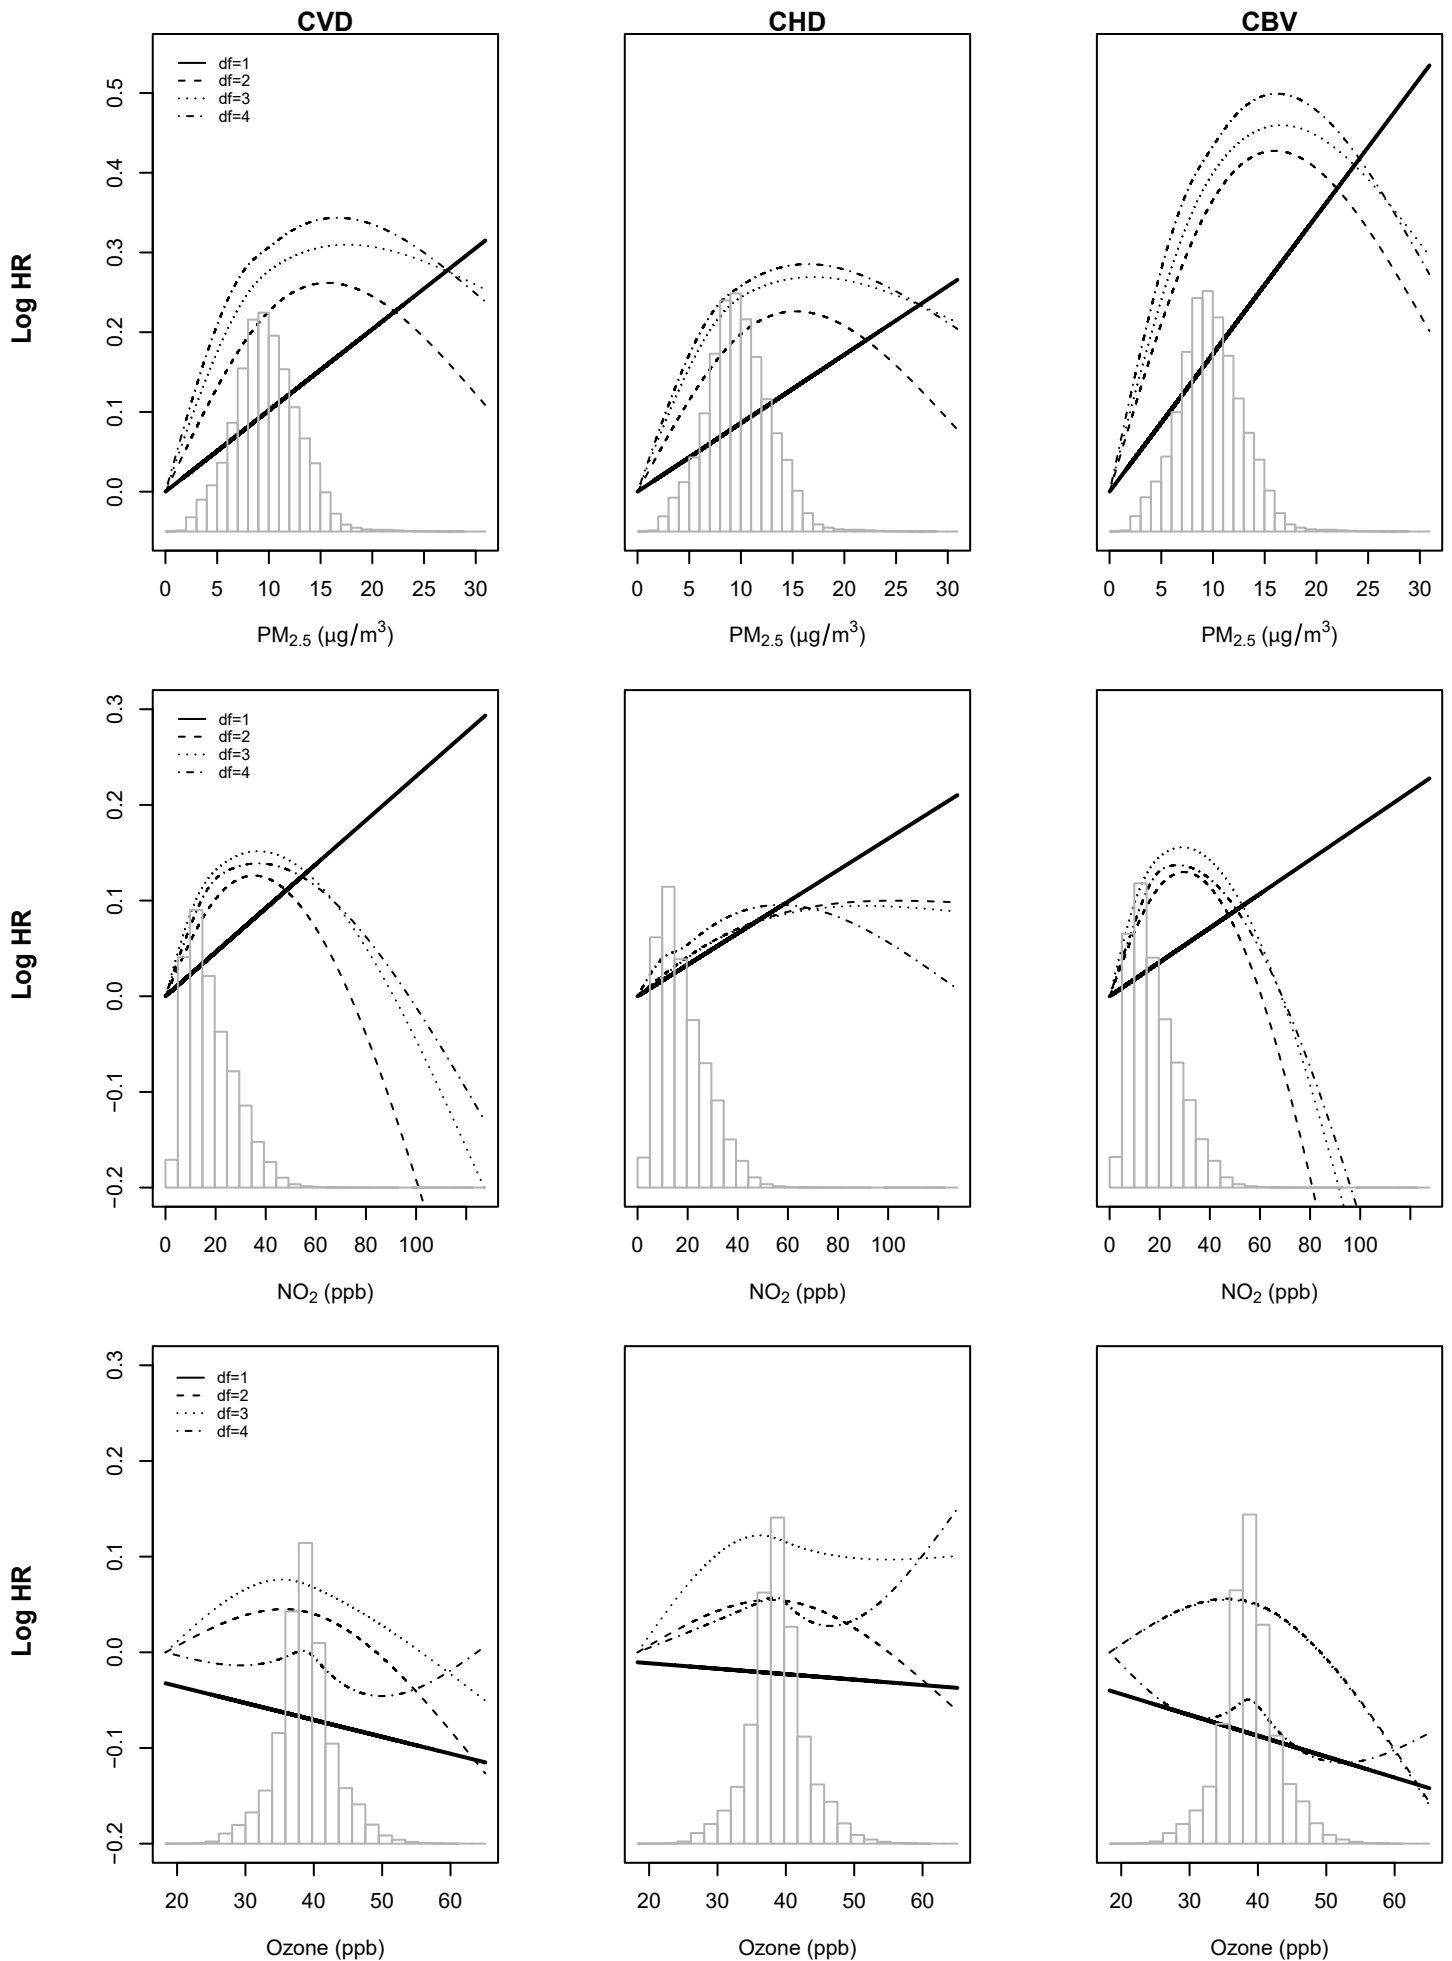

**Figure S5. Exposure-response curves (Model 4) with natural splines (2, 3 and 4 degrees of freedom) of PM<sub>2.5</sub>, NO<sub>2</sub> and ozone with cardiovascular disease hospitalization (CVD), coronary heart disease hospitalization (CHD) and cerebrovascular disease hospitalization (CBV) <sup>a</sup>.**

<sup>a</sup> Histograms of the exposure are shown on the x-axis.
